# Supplementary material for: Identification and Characterization of BMS-955176, a Second-Generation HIV-1 Maturation Inhibitor with Improved Potency, Antiviral Spectrum, and Gag Polymorphic Coverage
Source: PubMed Central journal article supplement (PMC4914680; doi:10.1128/aac.02560-15), 2016-06-20
Supplement: AAC.02560-15_zac007165282so1.pdf [file AAC.02560-15_zac007165282so1.pdf]

## Supplementary Experimental

**Cytotoxicity assays.**  $CC_{50}$  values (concentrations of drug required to reduce cell viability by 50%) of BMS-955176 were determined in MT-2 (human T cell line), Huh7 (human hepatocarcinoma), C33a (human cervical carcinoma), HeLa (epithelial cells) and MDCK (Madin-Darby canine kidney epithelial cells) after a 4 - 6 day incubation in the presence of serially-diluted compound. Cell viability was determined using a respiration assay (MTS, Promega) according to the manufacturer's protocol.(1)  $CC_{50}$ s values were calculated by using the exponential form of the median effect equation, where percent inhibition =  $1/[1 + (CC_{50}/\text{drug conc.})^m]$ , where  $m$  is a parameter that reflects the slope of the concentration-response curve.  $CC_{50}$  values (cell line) were  $9.2 \pm 4 \mu\text{M}$  (MT-2, human T cell line),  $3.8 \mu\text{M}$ , (Huh7, human hepatocarcinoma),  $>15 \mu\text{M}$  (C33a, human cervical carcinoma),  $2.3 \mu\text{M}$ , (HeLa, epithelial cells) and  $3.9 \mu\text{M}$ , (MDCK, Madin-Darby canine kidney epithelial cells). The  $CC_{50}$ s in the five cell lines are suggestive of moderate cytotoxicity, while the therapeutic index in MT-2 cells is relatively high (4842), indicating that the effects of BMS-955176 are virus-specific. In addition, in initial clinical studies, BMS-955176 has been safe and well tolerated.(2-4)

**Off-target activity assays.** BMS-955176 was examined in an *in vitro* HIV-1 reverse transcriptase assay (EnzChek® Reverse Transcriptase Assay Kit, Thermo Fisher, Waltham, MA, USA), an influenza virus polymerase assay,(5) an HIV-1 integrase inhibitor binding assay(6) and an HIV-1 protease cleavage assay (SensoLyte® 520 HIV-1 Protease Fluorimetric Assay, AnaSpec, San Jose, CA).

**Two-drug combination assays.** MT-2 cells were infected with NLRepRlucP373S virus at an MOI of 0.005, and the cells were seeded at a density of  $0.1 \times 10^6$  cells/mL onto 96-well plates containing 2-3 fold serially diluted compounds. The drugs were diluted in a fixed and multiple molar ratios, representing 1 : 1, 1 : 2.5, and 2.5 : 1 times the known  $EC_{50}$  for each drug (determined in prior experiments). The drug serial dilutions spanned a range of concentrations near the  $EC_{50}$  value of each compound, so that equivalent antiviral activities could be compared. After a 4 - 5 day incubation at

37°C/CO<sub>2</sub>, virus yields were determined by the *Renilla* luciferase activity (Dual-Luciferase® Reporter Assay System, Promega). There was no cytotoxicity associated with any of the drug combinations (no reduction in cell numbers by a companion assay of cells alone exposed to the same drug combinations). To determine antiviral effects of different drug combinations, combination indices (CIs) were calculated according to the method of Chou.(7) Concentration-response curves were estimated for each individual drug and every combination using the median-effect equation,  $F_a = 1/[1 + (ED_{50}/\text{drug concentration})^m]$ , where  $F_a$  stands for fraction affected.(8). The equation was fit using a nonlinear regression routine (Proc Nlin) in PC SAS version 8.01 (SAS Institute Inc., SAS Version 8.01, Cary, NC: SAS Institute Inc., 1990). Curves with an R-square values less than 0.90 were deleted.

#### **HIV-1 cell fusion assay.**

The ability to inhibit cell fusion events mediated by the HIV-1 gp160 envelope protein was analyzed (events up to and including fusion) by a luciferase readout as described,(9, 10) using 1) HeLa C14 cells (CD4/CXCR4/CCR5-positive) target cells which express TRE (tet-responsive element) controlled firefly luciferase reporter gene, and 2) NL-TOE donor cells which express HIV-1 envelope and tTA protein that trans-activates TRE-controlled gene expression upon cell-cell fusion.

**Serum binding assay.** Serum binding was determined using an ultracentrifugation method.(11) First, 53  $\mu\text{M}$  [<sup>3</sup>H]-BMS-955176 (specific activity 18.9 Ci/mmol) was diluted 10-fold in 100% DMSO, and 10- $\mu\text{L}$  aliquots were mixed with 1 mL of human serum in a 1.5 mL Eppendorf tube (Beckman Coulter, Brea, CA, USA). After 1-hour incubation at 37°C, the samples were centrifuged for 18 hours at 37°C in a TLA100.3 rotor in an Optima TLX ultracentrifuge at 58,000 rpm. One hundred  $\mu\text{L}$  fractions were collected from the top of the tubes. The fraction with < 1% of the total starting protein concentration (2nd fraction from the top out of 10 fractions) was taken as the protein-free fraction, and was measured for [<sup>3</sup>H]-BMS-955176-associated radioactivity. That value was compared to the total radioactivity used in the assay.



## Supplementary materials, tables and figures

**Supplementary Table S1. Differentiation of BMS-955176 from Bevirimat toward Gag Polymorphic Viruses**

|           | BMS-955176               |                     |    | Bevirimat                |                     |    | Nelfinavir               |                     |     |
|-----------|--------------------------|---------------------|----|--------------------------|---------------------|----|--------------------------|---------------------|-----|
|           | EC <sub>50</sub> ,<br>μM | Fold<br>(vs.<br>WT) | N  | EC <sub>50</sub> ,<br>μM | Fold<br>(vs.<br>WT) | N  | EC <sub>50</sub> ,<br>μM | Fold<br>(vs.<br>WT) | N   |
| Wild-type | 0.0019                   | -                   | 42 | 0.010                    | -                   | 56 | 0.004                    | -                   | 120 |
| V362I     | 0.0045                   | 2.2                 | 7  | 0.074                    | 7.4                 | 4  | 0.005                    | 1.3                 | 14  |
| V370A     | 0.0027                   | 1.4                 | 42 | 0.55                     | 55                  | 30 | 0.004                    | 1.2                 | 97  |
| V370M     | 0.0028                   | 1.5                 | 2  | 0.18                     | 181                 | 1  | 0.005                    | 1.4                 | 2   |
| ΔV370     | 0.013                    | 6.8                 | 41 | ≥10                      | ≥ 1000              | 16 | 0.005                    | 1.3                 | 92  |

Amino acid changes were introduced into NLRepRlucP373S (WT virus) and evaluated for antiviral activity in MT2 cells by luciferase activity as described in Materials and Methods. N = number of experiments performed, with each run performed in triplicate.

**Supplementary Table S2. Human Serum Effect on Antiviral Activity of BMS-955176**

|                                      | <b>EC<sub>50</sub> ± SD (nM)</b> | <b>N</b> | <b>FC vs. 10% FBS</b> |
|--------------------------------------|----------------------------------|----------|-----------------------|
| 10% FBS                              | 1.9 ± 1.8                        | 226      | 1                     |
| 10% FBS + 40% HS + 27 mg/mL HSA      | 10.2 ± 6.0                       | 76       | 5.4                   |
| 10% FBS + 45 mg/mL HSA               | 4.7                              | 2        | 2.5                   |
| 10% FBS + 40% HS                     | 4.9                              | 1        | 2.6                   |
| 10% FBS + 1 mg/mL AGP                | 1.0                              | 1        | 0.5                   |
| 10% FBS + 45 mg/mL HSA + 1 mg/mL AGP | 6.2                              | 1        | 3.3                   |

SD standard deviation, FC=FC-EC50



**Supplementary Table S4. Activity of BMS-955176 against Clinical Isolates**

| Group | Predominant SP1 QVT <sup>a</sup> | #<br>Isolates | BMS-955176                         | Range                    | Median                   |
|-------|----------------------------------|---------------|------------------------------------|--------------------------|--------------------------|
|       | Genotypes                        |               | Mean EC <sub>50</sub><br>(nM) ± SD | EC <sub>50</sub><br>(nM) | EC <sub>50</sub><br>(nM) |
| M     | B, (all)                         | 26            | 67 ± 172                           | 1-858                    | 21                       |
|       | B (96% of Gag diversity)         | 22            | 24 ± 24                            | 1-110                    | 17                       |
|       | A, V370A/Δ371                    | 14            | 44 ± 72                            | 5-280                    | 21                       |
|       | A <sup>b</sup>                   | 13            | 26 ± 25                            | 5-87                     | 20                       |
|       | AE, V370A/Δ371                   | 7             | 77 ± 46                            | 10-139                   | 77                       |
|       | C, ΔV370, V370A/ΔT371            | 14            | 116 ± 360                          | 1-1400                   | 14                       |
|       | C                                | 13            | 17 ± 11                            | 1-45                     | 14                       |
|       | C <sup>b</sup>                   | 1             | 1400                               | 1400                     | 1400                     |
|       | D, (V370A)                       | 11            | 7 ± 7                              | 1-21                     | 6                        |
|       | G, (V370A)                       | 3             | 11 ± 4                             | 8-15                     | 10                       |
|       | F, (V370A)                       | 1             | 5.9                                | 6                        | 6                        |
| N     |                                  | 1             | 7.2                                | 7                        | 7                        |
| O     |                                  | 5             | 170 ± 240                          | 1-552                    | 30                       |

<sup>a</sup>Gag amino acids Q369, V370, T371; Los Alamos National Laboratories database as of 2012; <sup>b</sup>subtype A and C isolates with reduced BMS-955176 susceptibility

**Supplementary Table S5. The combination indices, and overall interaction results, for BMS-955176 in combination with approved and preclinical antiretroviral compounds from different inhibitory classes**

| Molar Ratio<br>(EC <sub>50</sub> Ratio) <sup>a</sup> | Combination Indices at % HIV Inhibition <sup>b</sup> |                   |                   | Overall Result |
|------------------------------------------------------|------------------------------------------------------|-------------------|-------------------|----------------|
|                                                      | (Confidence Interval)                                |                   |                   |                |
|                                                      | 50%                                                  | 75%               | 90%               |                |
| Nucleoside Reverse transcriptase inhibitors          |                                                      |                   |                   |                |
| BMS-986001 - Expt 1                                  |                                                      |                   |                   |                |
| 3:400 (1:1)                                          | 0.86 (0.80, 0.93)                                    | 0.85 (0.76, 0.94) | 0.88 (0.74, 1.03) |                |
| 3:1000 (1:2.5)                                       | 0.85 (0.78, 0.92)                                    | 0.86 (0.76, 0.96) | 0.92 (0.75, 1.08) | Additive       |
| 3:160 (2.5:1)                                        | 0.80 (0.75, 0.86)                                    | 0.75 (0.68, 0.82) | 0.72 (0.62, 0.83) |                |
| BMS-986001- Expt 2                                   |                                                      |                   |                   |                |
| 3:400 (1:1)                                          | 0.84 (0.79, 0.89)                                    | 0.89 (0.82, 0.96) | 0.98 (0.86, 1.10) |                |
| 3:1000 (1:2.5)                                       | 0.96 (0.91, 1.02)                                    | 0.96 (0.88, 1.03) | 0.99 (0.87, 1.11) | Additive       |
| 3:160 (2.5:1)                                        | 0.94 (0.89, 0.98)                                    | 0.95 (0.88, 1.01) | 0.98 (0.87, 1.08) |                |
| Abacavir- Expt 1                                     |                                                      |                   |                   |                |
| 3:400 (1:1)                                          | 0.84(0.78,0.90)                                      | 0.90(0.81,0.98)   | 1.01(0.86,1.16)   |                |
| 3:1000 (1:2.5)                                       | 0.98(0.92,1.05)                                      | 1.00(0.90,1.10)   | 1.05(0.89,1.21)   | Additive       |
| 3:160 (2.5:1)                                        | 0.86(0.81,0.91)                                      | 0.84(0.77,0.90)   | 0.85(0.74,0.96)   |                |
| Abacavir-Expt 2                                      |                                                      |                   |                   |                |
| 3:400 (1:1)                                          | 0.83(0.79,0.88)                                      | 0.81(0.75,0.88)   | 0.83(0.73,0.93)   |                |
| 3:1000 (1:2.5)                                       | 0.87(0.82,0.92)                                      | 0.85(0.78,0.92)   | 0.85(0.74,0.96)   | Additive       |



**Supplementary Table S5. The combination indices, and overall interaction results, for BMS-955176 in combination with approved and preclinical antiretroviral compounds from different inhibitory classes**

|                                                 |                 |                 |                 |          |
|-------------------------------------------------|-----------------|-----------------|-----------------|----------|
| 3:160 (2.5:1)                                   | 0.77(0.73,0.81) | 0.83(0.76,0.89) | 0.92(0.81,1.04) |          |
| Non-Nucleoside Reverse Transcriptase Inhibitors |                 |                 |                 |          |
| Rilpivirine- Expt 1                             |                 |                 |                 |          |
| 15:2 (1:1)                                      | 1.07(1.00,1.15) | 1.00(0.91,1.10) | 0.94(0.79,1.08) |          |
| 3:1 (1:2.5)                                     | 0.95(0.89,1.02) | 0.88(0.80,0.97) | 0.82(0.70,0.94) | Additive |
| 75:4 (2.5:1)                                    | 0.86(0.79,0.92) | 0.84(0.76,0.93) | 0.83(0.69,0.96) |          |
| Rilpivirine- Expt 2                             |                 |                 |                 |          |
| 15:2 (1:1)                                      | 0.98(0.91,1.05) | 1.02(0.92,1.11) | 1.05(0.89,1.21) |          |
| 3:1 (1:2.5)                                     | 0.94(0.88,1.01) | 1.03(0.93,1.14) | 1.13(0.95,1.31) | Additive |
| 75:4 (2.5:1)                                    | 0.67(0.61,0.73) | 0.91(0.80,1.01) | 1.23(0.99,1.46) |          |
| Integrase Inhibitors                            |                 |                 |                 |          |
| dolutegravir- Expt 1                            |                 |                 |                 |          |
| 15:2 (1:1)                                      | 0.83(0.74,0.93) | 0.89(0.75,1.02) | 0.94(0.71,1.17) |          |
| 3:1 (1:2.5)                                     | 0.89(0.79,0.98) | 0.87(0.74,0.99) | 0.85(0.65,1.04) | Additive |
| 75:4 (2.5:1)                                    | 0.91(0.83,0.99) | 0.78(0.69,0.88) | 0.68(0.54,0.81) |          |
| dolutegravir- Expt 2                            |                 |                 |                 |          |
| 15:2 (1:1)                                      | 0.90(0.81,0.99) | 0.93(0.80,1.05) | 0.97(0.76,1.18) |          |
| 3:1 (1:2.5)                                     | 0.81(0.73,0.89) | 0.84(0.72,0.95) | 0.87(0.68,1.07) | Additive |
| 75:4 (2.5:1)                                    | 0.88(0.80,0.96) | 0.89(0.78,1.01) | 0.91(0.73,1.10) |          |

**Supplementary Table S5. The combination indices, and overall interaction results, for BMS-955176 in combination with approved and preclinical antiretroviral compounds from different inhibitory classes**

|                      |                 |                 |                 |          |
|----------------------|-----------------|-----------------|-----------------|----------|
| elvitegravir- Expt 1 |                 |                 |                 |          |
| 15:2 (1:1)           | 1.08(1.00,1.17) | 1.05(0.94,1.15) | 1.02(0.85,1.18) |          |
| 3:1 (1:2.5)          | 1.05(0.97,1.13) | 0.99(0.88,1.09) | 0.94(0.78,1.10) | Additive |
| 75:4 (2.5:1)         | 0.98(0.90,1.05) | 0.94(0.84,1.04) | 0.91(0.77,1.06) |          |
| elvitegravir-Expt 2  |                 |                 |                 |          |
| 15:2 (1:1)           | 0.90(0.83,0.96) | 0.83(0.74,0.93) | 0.79(0.65,0.93) |          |
| 3:1 (1:2.5)          | 0.92(0.85,1.00) | 0.86(0.76,0.96) | 0.81(0.66,0.96) | Additive |
| 75:4 (2.5:1)         | 0.82(0.74,0.89) | 0.95(0.83,1.08) | 1.12(0.89,1.35) |          |
| atazanavir (PI)      |                 |                 |                 |          |
| Atazanavir- Expt 1   |                 |                 |                 |          |
| 2:1 (1:1)            | 0.92(0.84,1.00) | 1.06(0.93,1.18) | 1.22(0.99,1.45) |          |
| 4:5 (1:2.5)          | 0.94(0.87,1.00) | 0.91(0.82,1.00) | 0.88(0.75,1.02) | Additive |
| 5:1 (2.5:1)          | 0.79(0.73,0.85) | 0.82(0.74,0.91) | 0.85(0.71,0.99) |          |
| Atazanavir- Expt 2   |                 |                 |                 |          |
| 2:1 (1:1)            | 0.99(0.92,1.06) | 0.92(0.83,1.00) | 0.85(0.72,0.97) |          |
| 4:5 (1:2.5)          | 1.01(0.93,1.08) | 0.97(0.87,1.07) | 0.94(0.79,1.09) | Additive |
| 5:1 (2.5:1)          | 0.98(0.90,1.06) | 1.02(0.91,1.14) | 1.07(0.88,1.26) |          |

<sup>a</sup>Molar ratio of BMS-955176 to comparator compound.

<sup>b</sup>A lower bound of the asymptotic confidence interval greater than 1 indicates antagonism, an upper bound of less than 1 indicated synergism and a value of 1 being contained within the interval indicates additivity. The 95% confidence intervals are shown in parenthesis, and represent a measure of variability in the data.

**Supplementary Figure S6. Western analysis of Gag cleavage ± BMS-955176**

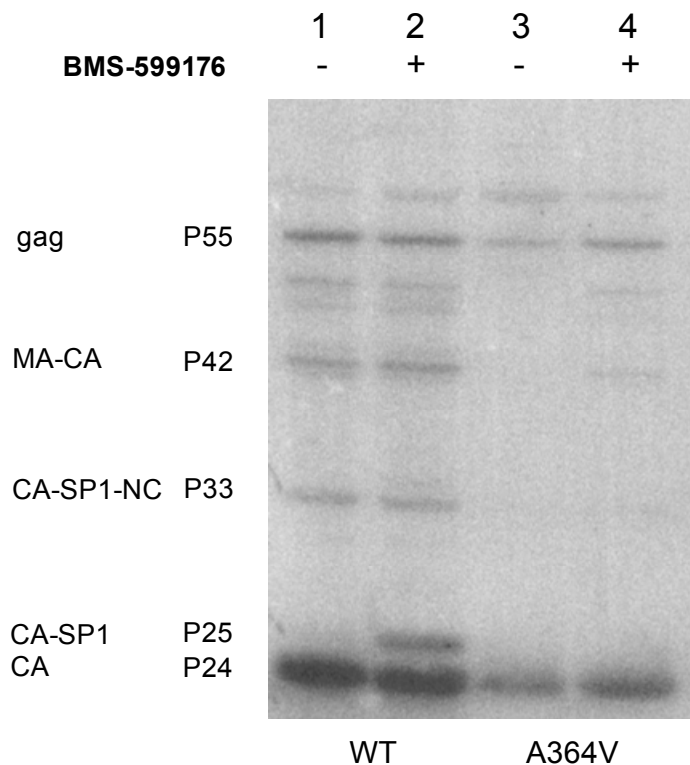

Inhibition of HIV-1 Gag cleavage of HIV-1 virus in cells; “-“ = no BMS-955176, “+” = 200 nM of BMS-955176. Western analysis using a primary anti-p24 monoclonal antibody (Perkin Elmer, NEA9306001), as described in Material and Methods.

**Supplementary Figure S7. Analysis of *gag/pr* recombinant subtype B, C and CRF01\_AE viruses using a single cycle assay**

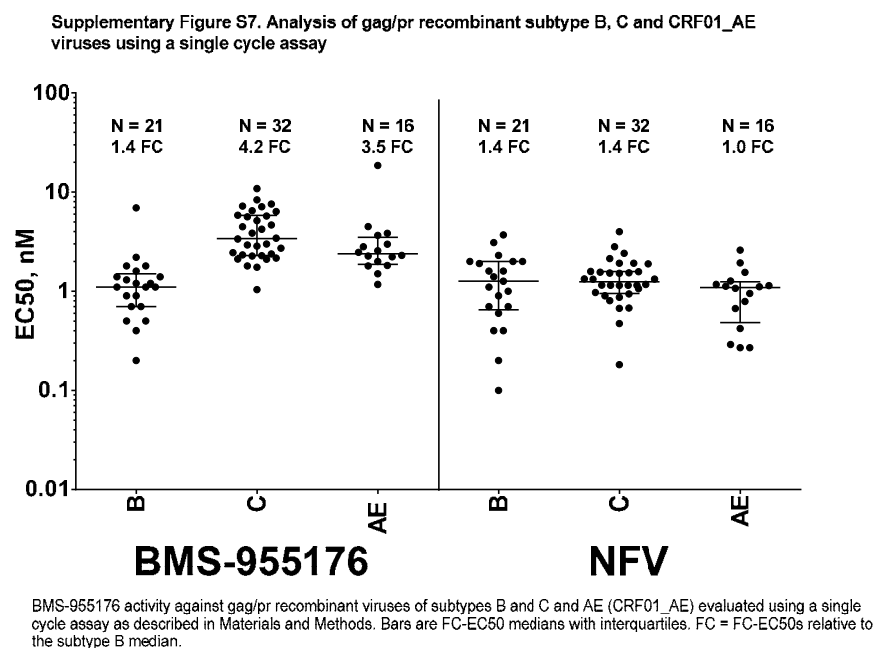

BMS-955176 activity against *gag/pr* recombinant viruses of subtypes B and C and AE (CRF01\_AE) evaluated using a single cycle assay as described in Materials and Methods. Bars are FC-EC<sub>50</sub> medians with interquartiles. FC = FC-EC<sub>50</sub>s relative to the subtype B median. Values above datapoints are means, see Table 4 in manuscript for details.

1. **Tominaga H, Ishiyama M, Ohseto F, Sasamoto K, Hamamoto T, Suzuki K, Watanabe M.** 1999. A water-soluble tetrazolium salt useful for colorimetric cell viability assay. *Analytical Communications* **36**:47-50.
2. **Hwang C, Schürmann D, Sobotha C, Sevinsky H, Ravindran P, Xiao H, Ray N, Krystal M, Dicker I, Lataillade M.** BMS-955176: Antiviral Activity and Safety of a Second-Generation HIV-1 Maturation Inhibitor, p Abstract 114LB. *In* (ed),
3. **Hwang C, Schürmann D, Sobotha C, Sevinsky H, Ravindran P, Xiao H, Ray N, Krystal M, Dicker I, Grasela D, Lataillade M.** Second-Generation HIV-1 Maturation Inhibitor BMS-955176: Antiviral Activity and Safety with Atazanavir ± Ritonavir, p Abstract TUAB0106LB. *In* (ed),
4. **Hwang C, Schartman R, Sobotha C, Sevinsky H, Ray N, Ravindran P, Xiao H, Krystal M, Dicker I, Grasela D, Lataillade M.** Overall Antiviral Activity and Safety Results from the Phase IIa Proof-of-Concept Study (AI468002). , p Abstract PS10/15. *In* (ed),
5. **Gerritz SW, Cianci C, Kim S, Pearce BC, Deminie C, Discotto L, McAuliffe B, Minassian BF, Shi S, Zhu S, Zhai W, Pendri A, Li G, Poss MA, Edavettal S, McDonnell PA, Lewis HA, Maskos K, Mortl M, Kiefersauer R, Steinbacher S, Baldwin ET, Metzler W, Bryson J, Healy MD, Philip T, Zoeckler M, Schartman R, Sinz M, Leyva-Grado VH, Hoffmann HH, Langley DR, Meanwell NA, Krystal M.** 2011. Inhibition of influenza virus replication via small molecules that induce the formation of higher-order nucleoprotein oligomers. *Proc Natl Acad Sci U S A* **108**:15366-15371.
6. **Dicker IB, Terry B, Lin Z, Li Z, Bollini S, Samanta HK, Gali V, Walker MA, Krystal MR.** 2008. Biochemical analysis of HIV-1 integrase variants resistant to strand transfer inhibitors. *J Biol Chem* **283**:23599-23609.

7. **Chou T-C.** 1991. The median-effect principle and the combination index for quantitation of synergism and antagonism, p 61-101. *In* Chou T-C, Rideout DC (ed), Synergism and antagonism in chemotherapy. Academic Press, San Diego, CA.
8. **Anonymous.** 1993. ACTG Virology Manual for HIV laboratory Version 2.0. DAIDS-NIAID
9. **Zhou N, Nowicka-Sans B, Zhang S, Fan L, Fang J, Fang H, Gong YF, Eggers B, Langley DR, Wang T, Kadow J, Grasela D, Hanna GJ, Alexander L, Colonno R, Krystal M, Lin PF.** 2011. In vivo patterns of resistance to the HIV attachment inhibitor BMS-488043. *Antimicrob Agents Chemother* **55**:729-737.
10. **Guo Q, Ho HT, Dicker I, Fan L, Zhou N, Friborg J, Wang T, McAuliffe BV, Wang HG, Rose RE, Fang H, Scarnati HT, Langley DR, Meanwell NA, Abraham R, Colonno RJ, Lin PF.** 2003. Biochemical and genetic characterizations of a novel human immunodeficiency virus type 1 inhibitor that blocks gp120-CD4 interactions. *J Virol* **77**:10528-10536.
11. **Nakai D, Kumamoto K, Sakikawa C, Kosaka T, Tokui T.** 2004. Evaluation of the protein binding ratio of drugs by a micro-scale ultracentrifugation method. *J Pharm Sci* **93**:847-854.
